# Supplementary material for: Identification of key candidate genes and biological pathways in bladder cancer
Source: PeerJ. 2018 Dec 4;6:e6036. doi: 10.7717/peerj.6036 (PMC6284430; doi:10.7717/peerj.6036)
Supplement: Supplemental Information 1 [file peerj-06-6036-s001.xlsx]

## Sheet: GSE7476
Sample ID	Type	Platform	Stage	Grade	Biological source	Organism	Molecule	Gender
GSM180991	Normal bladder tissues	GPL570	none	none	Normal bladder tissues	Homo sapiens	total RNA	no information
GSM180992	Normal bladder tissues	GPL570	none	none	Normal bladder tissues	Homo sapiens	total RNA	no information
GSM180993	Normal bladder tissues	GPL570	none	none	Normal bladder tissues	Homo sapiens	total RNA	no information
GSM180994	Tumoral bladder tissues	GPL570	Ta	low	no information	Homo sapiens	total RNA	no information
GSM180995	Tumoral bladder tissues	GPL570	Ta	low	no information	Homo sapiens	total RNA	no information
GSM180996	Tumoral bladder tissues	GPL570	Ta	low	no information	Homo sapiens	total RNA	no information
GSM180997	Tumoral bladder tissues	GPL570	T1	high	no information	Homo sapiens	total RNA	no information
GSM180998	Tumoral bladder tissues	GPL570	T1	high	no information	Homo sapiens	total RNA	no information
GSM180999	Tumoral bladder tissues	GPL570	T1	high	no information	Homo sapiens	total RNA	no information
GSM181000	Tumoral bladder tissues	GPL570	T2, T3 or T4	high	no information	Homo sapiens	total RNA	no information
GSM181001	Tumoral bladder tissues	GPL570	T2, T3 or T4	high	no information	Homo sapiens	total RNA	no information
GSM181002	Tumoral bladder tissues	GPL570	T2, T3 or T4	high	no information	Homo sapiens	total RNA	no information

## Sheet: GSE13507
Sample ID	Type	Platform	Stage	Grade	Biological source	Organism	Molecule	Gender
GSM340537	Normal bladder tissues	GPL6102	none	none	Normal bladder tissues	Homo sapiens	total RNA	no information
GSM340538	Normal bladder tissues	GPL6102	none	none	Normal bladder tissues	Homo sapiens	total RNA	no information
GSM340539	Normal bladder tissues	GPL6102	none	none	Normal bladder tissues	Homo sapiens	total RNA	no information
GSM340540	Normal bladder tissues	GPL6102	none	none	Normal bladder tissues	Homo sapiens	total RNA	no information
GSM340541	Normal bladder tissues	GPL6102	none	none	Normal bladder tissues	Homo sapiens	total RNA	no information
GSM340542	Normal bladder tissues	GPL6102	none	none	Normal bladder tissues	Homo sapiens	total RNA	no information
GSM340543	Normal bladder tissues	GPL6102	none	none	Normal bladder tissues	Homo sapiens	total RNA	no information
GSM340544	Normal bladder tissues	GPL6102	none	none	Normal bladder tissues	Homo sapiens	total RNA	no information
GSM340545	Normal bladder tissues	GPL6102	none	none	Normal bladder tissues	Homo sapiens	total RNA	no information
GSM340546	Normal bladder tissues	GPL6102	none	none	Normal bladder tissues	Homo sapiens	total RNA	no information
GSM340547	Normal surrounding tissues	GPL6102	none	none	bladder mucosae surrounding cancer	Homo sapiens	total RNA	no information
GSM340548	Normal surrounding tissues	GPL6102	none	none	bladder mucosae surrounding cancer	Homo sapiens	total RNA	no information
GSM340549	Normal surrounding tissues	GPL6102	none	none	bladder mucosae surrounding cancer	Homo sapiens	total RNA	no information
GSM340550	Normal surrounding tissues	GPL6102	none	none	bladder mucosae surrounding cancer	Homo sapiens	total RNA	no information
GSM340551	Normal surrounding tissues	GPL6102	none	none	bladder mucosae surrounding cancer	Homo sapiens	total RNA	no information
GSM340552	Normal surrounding tissues	GPL6102	none	none	bladder mucosae surrounding cancer	Homo sapiens	total RNA	no information
GSM340553	Normal surrounding tissues	GPL6102	none	none	bladder mucosae surrounding cancer	Homo sapiens	total RNA	no information
GSM340554	Normal surrounding tissues	GPL6102	none	none	bladder mucosae surrounding cancer	Homo sapiens	total RNA	no information
GSM340555	Normal surrounding tissues	GPL6102	none	none	bladder mucosae surrounding cancer	Homo sapiens	total RNA	no information
GSM340556	Normal surrounding tissues	GPL6102	none	none	bladder mucosae surrounding cancer	Homo sapiens	total RNA	no information
GSM340557	Normal surrounding tissues	GPL6102	none	none	bladder mucosae surrounding cancer	Homo sapiens	total RNA	no information
GSM340558	Normal surrounding tissues	GPL6102	none	none	bladder mucosae surrounding cancer	Homo sapiens	total RNA	no information
GSM340559	Normal surrounding tissues	GPL6102	none	none	bladder mucosae surrounding cancer	Homo sapiens	total RNA	no information
GSM340560	Normal surrounding tissues	GPL6102	none	none	bladder mucosae surrounding cancer	Homo sapiens	total RNA	no information
GSM340561	Normal surrounding tissues	GPL6102	none	none	bladder mucosae surrounding cancer	Homo sapiens	total RNA	no information
GSM340562	Normal surrounding tissues	GPL6102	none	none	bladder mucosae surrounding cancer	Homo sapiens	total RNA	no information
GSM340563	Normal surrounding tissues	GPL6102	none	none	bladder mucosae surrounding cancer	Homo sapiens	total RNA	no information
GSM340564	Normal surrounding tissues	GPL6102	none	none	bladder mucosae surrounding cancer	Homo sapiens	total RNA	no information
GSM340565	Normal surrounding tissues	GPL6102	none	none	bladder mucosae surrounding cancer	Homo sapiens	total RNA	no information
GSM340566	Normal surrounding tissues	GPL6102	none	none	bladder mucosae surrounding cancer	Homo sapiens	total RNA	no information
GSM340567	Normal surrounding tissues	GPL6102	none	none	bladder mucosae surrounding cancer	Homo sapiens	total RNA	no information
GSM340568	Normal surrounding tissues	GPL6102	none	none	bladder mucosae surrounding cancer	Homo sapiens	total RNA	no information
GSM340569	Normal surrounding tissues	GPL6102	none	none	bladder mucosae surrounding cancer	Homo sapiens	total RNA	no information
GSM340570	Normal surrounding tissues	GPL6102	none	none	bladder mucosae surrounding cancer	Homo sapiens	total RNA	no information
GSM340571	Normal surrounding tissues	GPL6102	none	none	bladder mucosae surrounding cancer	Homo sapiens	total RNA	no information
GSM340572	Normal surrounding tissues	GPL6102	none	none	bladder mucosae surrounding cancer	Homo sapiens	total RNA	no information
GSM340573	Normal surrounding tissues	GPL6102	none	none	bladder mucosae surrounding cancer	Homo sapiens	total RNA	no information
GSM340574	Normal surrounding tissues	GPL6102	none	none	bladder mucosae surrounding cancer	Homo sapiens	total RNA	no information
GSM340575	Normal surrounding tissues	GPL6102	none	none	bladder mucosae surrounding cancer	Homo sapiens	total RNA	no information
GSM340576	Normal surrounding tissues	GPL6102	none	none	bladder mucosae surrounding cancer	Homo sapiens	total RNA	no information
GSM340577	Normal surrounding tissues	GPL6102	none	none	bladder mucosae surrounding cancer	Homo sapiens	total RNA	no information
GSM340578	Normal surrounding tissues	GPL6102	none	none	bladder mucosae surrounding cancer	Homo sapiens	total RNA	no information
GSM340579	Normal surrounding tissues	GPL6102	none	none	bladder mucosae surrounding cancer	Homo sapiens	total RNA	no information
GSM340580	Normal surrounding tissues	GPL6102	none	none	bladder mucosae surrounding cancer	Homo sapiens	total RNA	no information
GSM340581	Normal surrounding tissues	GPL6102	none	none	bladder mucosae surrounding cancer	Homo sapiens	total RNA	no information
GSM340582	Normal surrounding tissues	GPL6102	none	none	bladder mucosae surrounding cancer	Homo sapiens	total RNA	no information
GSM340583	Normal surrounding tissues	GPL6102	none	none	bladder mucosae surrounding cancer	Homo sapiens	total RNA	no information
GSM340584	Normal surrounding tissues	GPL6102	none	none	bladder mucosae surrounding cancer	Homo sapiens	total RNA	no information
GSM340585	Normal surrounding tissues	GPL6102	none	none	bladder mucosae surrounding cancer	Homo sapiens	total RNA	no information
GSM340586	Normal surrounding tissues	GPL6102	none	none	bladder mucosae surrounding cancer	Homo sapiens	total RNA	no information
GSM340587	Normal surrounding tissues	GPL6102	none	none	bladder mucosae surrounding cancer	Homo sapiens	total RNA	no information
GSM340588	Normal surrounding tissues	GPL6102	none	none	bladder mucosae surrounding cancer	Homo sapiens	total RNA	no information
GSM340589	Normal surrounding tissues	GPL6102	none	none	bladder mucosae surrounding cancer	Homo sapiens	total RNA	no information
GSM340590	Normal surrounding tissues	GPL6102	none	none	bladder mucosae surrounding cancer	Homo sapiens	total RNA	no information
GSM340591	Normal surrounding tissues	GPL6102	none	none	bladder mucosae surrounding cancer	Homo sapiens	total RNA	no information
GSM340592	Normal surrounding tissues	GPL6102	none	none	bladder mucosae surrounding cancer	Homo sapiens	total RNA	no information
GSM340593	Normal surrounding tissues	GPL6102	none	none	bladder mucosae surrounding cancer	Homo sapiens	total RNA	no information
GSM340594	Normal surrounding tissues	GPL6102	none	none	bladder mucosae surrounding cancer	Homo sapiens	total RNA	no information
GSM340595	Normal surrounding tissues	GPL6102	none	none	bladder mucosae surrounding cancer	Homo sapiens	total RNA	no information
GSM340596	Normal surrounding tissues	GPL6102	none	none	bladder mucosae surrounding cancer	Homo sapiens	total RNA	no information
GSM340597	Normal surrounding tissues	GPL6102	none	none	bladder mucosae surrounding cancer	Homo sapiens	total RNA	no information
GSM340598	Normal surrounding tissues	GPL6102	none	none	bladder mucosae surrounding cancer	Homo sapiens	total RNA	no information
GSM340599	Normal surrounding tissues	GPL6102	none	none	bladder mucosae surrounding cancer	Homo sapiens	total RNA	no information
GSM340600	Normal surrounding tissues	GPL6102	none	none	bladder mucosae surrounding cancer	Homo sapiens	total RNA	no information
GSM340601	Normal surrounding tissues	GPL6102	none	none	bladder mucosae surrounding cancer	Homo sapiens	total RNA	no information
GSM340602	Normal surrounding tissues	GPL6102	none	none	bladder mucosae surrounding cancer	Homo sapiens	total RNA	no information
GSM340603	Normal surrounding tissues	GPL6102	none	none	bladder mucosae surrounding cancer	Homo sapiens	total RNA	no information
GSM340604	Normal surrounding tissues	GPL6102	none	none	bladder mucosae surrounding cancer	Homo sapiens	total RNA	no information
GSM340605	Tumoral bladder tissues	GPL6102	T1N0M0	low	primary bladder cancer	Homo sapiens	total RNA	male
GSM340606	Tumoral bladder tissues	GPL6102	TaN0M0	low	primary bladder cancer	Homo sapiens	total RNA	female
GSM340607	Tumoral bladder tissues	GPL6102	TaN0M0	low	primary bladder cancer	Homo sapiens	total RNA	male
GSM340608	Tumoral bladder tissues	GPL6102	T1N0M0	low	primary bladder cancer	Homo sapiens	total RNA	male
GSM340609	Tumoral bladder tissues	GPL6102	T1N0M0	low	primary bladder cancer	Homo sapiens	total RNA	male
GSM340610	Tumoral bladder tissues	GPL6102	T1N0M0	low	primary bladder cancer	Homo sapiens	total RNA	male
GSM340611	Tumoral bladder tissues	GPL6102	T1N0M0	low	primary bladder cancer	Homo sapiens	total RNA	male
GSM340612	Tumoral bladder tissues	GPL6102	T2N0M0	low	primary bladder cancer	Homo sapiens	total RNA	male
GSM340613	Tumoral bladder tissues	GPL6102	T3bN0M0	high	primary bladder cancer	Homo sapiens	total RNA	female
GSM340614	Tumoral bladder tissues	GPL6102	T3aN0M0	low	primary bladder cancer	Homo sapiens	total RNA	male
GSM340615	Tumoral bladder tissues	GPL6102	TaN0M0	low	primary bladder cancer	Homo sapiens	total RNA	male
GSM340616	Tumoral bladder tissues	GPL6102	TaN0M0	low	primary bladder cancer	Homo sapiens	total RNA	female
GSM340617	Tumoral bladder tissues	GPL6102	T1N0M0	low	primary bladder cancer	Homo sapiens	total RNA	male
GSM340618	Tumoral bladder tissues	GPL6102	T4N0M0	low	primary bladder cancer	Homo sapiens	total RNA	male
GSM340619	Tumoral bladder tissues	GPL6102	T1N0M0	low	primary bladder cancer	Homo sapiens	total RNA	male
GSM340620	Tumoral bladder tissues	GPL6102	T3aN2M1	low	primary bladder cancer	Homo sapiens	total RNA	male
GSM340621	Tumoral bladder tissues	GPL6102	T1N0M0	low	primary bladder cancer	Homo sapiens	total RNA	male
GSM340622	Tumoral bladder tissues	GPL6102	TaN0M0	low	primary bladder cancer	Homo sapiens	total RNA	male
GSM340623	Tumoral bladder tissues	GPL6102	T4N2M1	high	primary bladder cancer	Homo sapiens	total RNA	female
GSM340624	Tumoral bladder tissues	GPL6102	T1N0M0	low	primary bladder cancer	Homo sapiens	total RNA	male
GSM340625	Tumoral bladder tissues	GPL6102	T1N0M0	low	primary bladder cancer	Homo sapiens	total RNA	male
GSM340626	Tumoral bladder tissues	GPL6102	T1N0M0	low	primary bladder cancer	Homo sapiens	total RNA	male
GSM340627	Tumoral bladder tissues	GPL6102	T1N0M0	low	primary bladder cancer	Homo sapiens	total RNA	female
GSM340628	Tumoral bladder tissues	GPL6102	T3aN0M0	high	primary bladder cancer	Homo sapiens	total RNA	male
GSM340629	Tumoral bladder tissues	GPL6102	T1N0M0	low	primary bladder cancer	Homo sapiens	total RNA	male
GSM340630	Tumoral bladder tissues	GPL6102	T2N0M0	low	primary bladder cancer	Homo sapiens	total RNA	male
GSM340631	Tumoral bladder tissues	GPL6102	TaN0M0	low	primary bladder cancer	Homo sapiens	total RNA	male
GSM340632	Tumoral bladder tissues	GPL6102	T1N0M0	low	primary bladder cancer	Homo sapiens	total RNA	male
GSM340633	Tumoral bladder tissues	GPL6102	T3bN0M0	high	primary bladder cancer	Homo sapiens	total RNA	male
GSM340634	Tumoral bladder tissues	GPL6102	T3aN0M0	high	primary bladder cancer	Homo sapiens	total RNA	male
GSM340635	Tumoral bladder tissues	GPL6102	TaN0M0	low	primary bladder cancer	Homo sapiens	total RNA	male
GSM340636	Tumoral bladder tissues	GPL6102	T2N0M0	high	primary bladder cancer	Homo sapiens	total RNA	female
GSM340637	Tumoral bladder tissues	GPL6102	T1N0M0	low	primary bladder cancer	Homo sapiens	total RNA	male
GSM340638	Tumoral bladder tissues	GPL6102	T1N0M0	low	primary bladder cancer	Homo sapiens	total RNA	male
GSM340639	Tumoral bladder tissues	GPL6102	TaN0M0	low	primary bladder cancer	Homo sapiens	total RNA	male
GSM340640	Tumoral bladder tissues	GPL6102	TaN0M0	low	primary bladder cancer	Homo sapiens	total RNA	male
GSM340641	Tumoral bladder tissues	GPL6102	T1N0M0	high	primary bladder cancer	Homo sapiens	total RNA	male
GSM340642	Tumoral bladder tissues	GPL6102	T1N0M0	low	primary bladder cancer	Homo sapiens	total RNA	male
GSM340643	Tumoral bladder tissues	GPL6102	T1N0M0	low	primary bladder cancer	Homo sapiens	total RNA	male
GSM340644	Tumoral bladder tissues	GPL6102	TaN0M0	low	primary bladder cancer	Homo sapiens	total RNA	male
GSM340645	Tumoral bladder tissues	GPL6102	T1N0M0	high	primary bladder cancer	Homo sapiens	total RNA	male
GSM340646	Tumoral bladder tissues	GPL6102	T1N0M0	high	primary bladder cancer	Homo sapiens	total RNA	female
GSM340647	Tumoral bladder tissues	GPL6102	T1N0M0	low	primary bladder cancer	Homo sapiens	total RNA	male
GSM340648	Tumoral bladder tissues	GPL6102	T2N0M0	low	primary bladder cancer	Homo sapiens	total RNA	male
GSM340649	Tumoral bladder tissues	GPL6102	T1N0M0	low	primary bladder cancer	Homo sapiens	total RNA	male
GSM340650	Tumoral bladder tissues	GPL6102	T1N0M0	low	primary bladder cancer	Homo sapiens	total RNA	male
GSM340651	Tumoral bladder tissues	GPL6102	T1N0M0	low	primary bladder cancer	Homo sapiens	total RNA	male
GSM340652	Tumoral bladder tissues	GPL6102	T1N0M0	low	primary bladder cancer	Homo sapiens	total RNA	male
GSM340653	Tumoral bladder tissues	GPL6102	T3bN0M0	high	primary bladder cancer	Homo sapiens	total RNA	male
GSM340654	Tumoral bladder tissues	GPL6102	T3bN2M0	high	primary bladder cancer	Homo sapiens	total RNA	male
GSM340655	Tumoral bladder tissues	GPL6102	T1N0M0	high	primary bladder cancer	Homo sapiens	total RNA	female
GSM340656	Tumoral bladder tissues	GPL6102	T1N0M0	high	primary bladder cancer	Homo sapiens	total RNA	male
GSM340657	Tumoral bladder tissues	GPL6102	T1N0M0	low	primary bladder cancer	Homo sapiens	total RNA	male
GSM340658	Tumoral bladder tissues	GPL6102	T1N0M0	low	primary bladder cancer	Homo sapiens	total RNA	male
GSM340659	Tumoral bladder tissues	GPL6102	T1N0M0	low	primary bladder cancer	Homo sapiens	total RNA	male
GSM340660	Tumoral bladder tissues	GPL6102	T2N0M0	low	primary bladder cancer	Homo sapiens	total RNA	male
GSM340661	Tumoral bladder tissues	GPL6102	T1N0M0	low	primary bladder cancer	Homo sapiens	total RNA	male
GSM340662	Tumoral bladder tissues	GPL6102	T1N0M0	high	primary bladder cancer	Homo sapiens	total RNA	male
GSM340663	Tumoral bladder tissues	GPL6102	T1N0M0	high	primary bladder cancer	Homo sapiens	total RNA	male
GSM340664	Tumoral bladder tissues	GPL6102	TaN0M0	low	primary bladder cancer	Homo sapiens	total RNA	male
GSM340665	Tumoral bladder tissues	GPL6102	T2N1M1	high	primary bladder cancer	Homo sapiens	total RNA	male
GSM340666	Tumoral bladder tissues	GPL6102	T1N0M0	low	primary bladder cancer	Homo sapiens	total RNA	male
GSM340667	Tumoral bladder tissues	GPL6102	T1N0M0	low	primary bladder cancer	Homo sapiens	total RNA	female
GSM340668	Tumoral bladder tissues	GPL6102	TaN0M0	low	primary bladder cancer	Homo sapiens	total RNA	male
GSM340669	Tumoral bladder tissues	GPL6102	T1N0M0	low	primary bladder cancer	Homo sapiens	total RNA	male
GSM340670	Tumoral bladder tissues	GPL6102	TaN0M0	low	primary bladder cancer	Homo sapiens	total RNA	male
GSM340671	Tumoral bladder tissues	GPL6102	T1N0M0	high	primary bladder cancer	Homo sapiens	total RNA	male
GSM340672	Tumoral bladder tissues	GPL6102	T3bN0M0	high	primary bladder cancer	Homo sapiens	total RNA	male
GSM340673	Tumoral bladder tissues	GPL6102	T2N0M0	low	primary bladder cancer	Homo sapiens	total RNA	female
GSM340674	Tumoral bladder tissues	GPL6102	T2N0M0	high	primary bladder cancer	Homo sapiens	total RNA	male
GSM340675	Tumoral bladder tissues	GPL6102	T1N0M0	high	primary bladder cancer	Homo sapiens	total RNA	male
GSM340676	Tumoral bladder tissues	GPL6102	TaN0M0	low	primary bladder cancer	Homo sapiens	total RNA	male
GSM340677	Tumoral bladder tissues	GPL6102	T2N0M0	high	primary bladder cancer	Homo sapiens	total RNA	male
GSM340678	Tumoral bladder tissues	GPL6102	T4N0M0	high	primary bladder cancer	Homo sapiens	total RNA	male
GSM340679	Tumoral bladder tissues	GPL6102	T1N0M0	low	primary bladder cancer	Homo sapiens	total RNA	male
GSM340680	Tumoral bladder tissues	GPL6102	T1N0M0	low	primary bladder cancer	Homo sapiens	total RNA	male
GSM340681	Tumoral bladder tissues	GPL6102	T1N0M0	high	primary bladder cancer	Homo sapiens	total RNA	male
GSM340682	Tumoral bladder tissues	GPL6102	T1N0M0	low	primary bladder cancer	Homo sapiens	total RNA	male
GSM340683	Tumoral bladder tissues	GPL6102	T1N0M0	low	primary bladder cancer	Homo sapiens	total RNA	male
GSM340684	Tumoral bladder tissues	GPL6102	T4N0M0	high	primary bladder cancer	Homo sapiens	total RNA	male
GSM340685	Tumoral bladder tissues	GPL6102	T1N0M0	low	primary bladder cancer	Homo sapiens	total RNA	male
GSM340686	Tumoral bladder tissues	GPL6102	T1N0M0	low	primary bladder cancer	Homo sapiens	total RNA	male
GSM340687	Tumoral bladder tissues	GPL6102	T1N0M0	low	primary bladder cancer	Homo sapiens	total RNA	female
GSM340688	Tumoral bladder tissues	GPL6102	T1N0M0	low	primary bladder cancer	Homo sapiens	total RNA	male
GSM340689	Tumoral bladder tissues	GPL6102	T1N0M0	low	primary bladder cancer	Homo sapiens	total RNA	female
GSM340690	Tumoral bladder tissues	GPL6102	T1N0M0	low	primary bladder cancer	Homo sapiens	total RNA	male
GSM340691	Tumoral bladder tissues	GPL6102	T1N0M0	low	primary bladder cancer	Homo sapiens	total RNA	female
GSM340692	Tumoral bladder tissues	GPL6102	T1N0M0	low	primary bladder cancer	Homo sapiens	total RNA	male
GSM340693	Tumoral bladder tissues	GPL6102	T2N0M0	high	primary bladder cancer	Homo sapiens	total RNA	female
GSM340694	Tumoral bladder tissues	GPL6102	T2N0M0	high	primary bladder cancer	Homo sapiens	total RNA	male
GSM340695	Tumoral bladder tissues	GPL6102	T1N0M0	low	primary bladder cancer	Homo sapiens	total RNA	male
GSM340696	Tumoral bladder tissues	GPL6102	T3N1M0	high	primary bladder cancer	Homo sapiens	total RNA	male
GSM340697	Tumoral bladder tissues	GPL6102	T3N0M0	high	primary bladder cancer	Homo sapiens	total RNA	male
GSM340698	Tumoral bladder tissues	GPL6102	T1N0M0	high	primary bladder cancer	Homo sapiens	total RNA	male
GSM340699	Tumoral bladder tissues	GPL6102	T1N0M0	low	primary bladder cancer	Homo sapiens	total RNA	male
GSM340700	Tumoral bladder tissues	GPL6102	T2N0M0	high	primary bladder cancer	Homo sapiens	total RNA	male
GSM340701	Tumoral bladder tissues	GPL6102	T3bN0M0	high	primary bladder cancer	Homo sapiens	total RNA	female
GSM340702	Tumoral bladder tissues	GPL6102	T4N1M1	low	primary bladder cancer	Homo sapiens	total RNA	female
GSM340703	Tumoral bladder tissues	GPL6102	TaN0M0	low	primary bladder cancer	Homo sapiens	total RNA	male
GSM340704	Tumoral bladder tissues	GPL6102	T2N1M0	high	primary bladder cancer	Homo sapiens	total RNA	male
GSM340705	Tumoral bladder tissues	GPL6102	T3bN0M0	high	primary bladder cancer	Homo sapiens	total RNA	male
GSM340706	Tumoral bladder tissues	GPL6102	T2N0M0	high	primary bladder cancer	Homo sapiens	total RNA	male
GSM340707	Tumoral bladder tissues	GPL6102	TaN0M0	low	primary bladder cancer	Homo sapiens	total RNA	male
GSM340708	Tumoral bladder tissues	GPL6102	T1N0M0	high	primary bladder cancer	Homo sapiens	total RNA	male
GSM340709	Tumoral bladder tissues	GPL6102	T2N0M0	low	primary bladder cancer	Homo sapiens	total RNA	female
GSM340710	Tumoral bladder tissues	GPL6102	T1N0M0	high	primary bladder cancer	Homo sapiens	total RNA	male
GSM340711	Tumoral bladder tissues	GPL6102	T1N0M0	low	primary bladder cancer	Homo sapiens	total RNA	female
GSM340712	Tumoral bladder tissues	GPL6102	T2N2M0	high	primary bladder cancer	Homo sapiens	total RNA	male
GSM340713	Tumoral bladder tissues	GPL6102	T1N0M0	low	primary bladder cancer	Homo sapiens	total RNA	male
GSM340714	Tumoral bladder tissues	GPL6102	T2bN0M0	high	primary bladder cancer	Homo sapiens	total RNA	male
GSM340715	Tumoral bladder tissues	GPL6102	T2N0M0	low	primary bladder cancer	Homo sapiens	total RNA	male
GSM340716	Tumoral bladder tissues	GPL6102	T1N0M0	low	primary bladder cancer	Homo sapiens	total RNA	female
GSM340717	Tumoral bladder tissues	GPL6102	T1N0M0	low	primary bladder cancer	Homo sapiens	total RNA	male
GSM340718	Tumoral bladder tissues	GPL6102	T2aN0M0	low	primary bladder cancer	Homo sapiens	total RNA	male
GSM340719	Tumoral bladder tissues	GPL6102	T1N0M0	low	primary bladder cancer	Homo sapiens	total RNA	male
GSM340720	Tumoral bladder tissues	GPL6102	T2aN0M0	high	primary bladder cancer	Homo sapiens	total RNA	male
GSM340721	Tumoral bladder tissues	GPL6102	T2N0M0	high	primary bladder cancer	Homo sapiens	total RNA	male
GSM340722	Tumoral bladder tissues	GPL6102	T1N0M0	low	primary bladder cancer	Homo sapiens	total RNA	female
GSM340723	Tumoral bladder tissues	GPL6102	T3N0M0	high	primary bladder cancer	Homo sapiens	total RNA	female
GSM340724	Tumoral bladder tissues	GPL6102	TaN0M0	low	primary bladder cancer	Homo sapiens	total RNA	male
GSM340725	Tumoral bladder tissues	GPL6102	T3N1M0	high	primary bladder cancer	Homo sapiens	total RNA	male
GSM340726	Tumoral bladder tissues	GPL6102	TaN0M0	low	primary bladder cancer	Homo sapiens	total RNA	male
GSM340727	Tumoral bladder tissues	GPL6102	T4aN0M0	low	primary bladder cancer	Homo sapiens	total RNA	male
GSM340728	Tumoral bladder tissues	GPL6102	T3N0M0	high	primary bladder cancer	Homo sapiens	total RNA	female
GSM340729	Tumoral bladder tissues	GPL6102	T2N0M0	low	primary bladder cancer	Homo sapiens	total RNA	male
GSM340730	Tumoral bladder tissues	GPL6102	TaN0M0	low	primary bladder cancer	Homo sapiens	total RNA	male
GSM340731	Tumoral bladder tissues	GPL6102	T2N0M0	high	primary bladder cancer	Homo sapiens	total RNA	male
GSM340732	Tumoral bladder tissues	GPL6102	T3N1M0	high	primary bladder cancer	Homo sapiens	total RNA	female
GSM340733	Tumoral bladder tissues	GPL6102	T2N0M0	low	primary bladder cancer	Homo sapiens	total RNA	male
GSM340734	Tumoral bladder tissues	GPL6102	TaN0M0	low	primary bladder cancer	Homo sapiens	total RNA	male
GSM340735	Tumoral bladder tissues	GPL6102	T1N0M0	low	primary bladder cancer	Homo sapiens	total RNA	male
GSM340736	Tumoral bladder tissues	GPL6102	T1N0M0	high	primary bladder cancer	Homo sapiens	total RNA	male
GSM340737	Tumoral bladder tissues	GPL6102	T1N0M0	low	primary bladder cancer	Homo sapiens	total RNA	male
GSM340738	Tumoral bladder tissues	GPL6102	T1N0M0	low	primary bladder cancer	Homo sapiens	total RNA	male
GSM340739	Tumoral bladder tissues	GPL6102	T1N0M0	low	primary bladder cancer	Homo sapiens	total RNA	male
GSM340740	Tumoral bladder tissues	GPL6102	T1N0M0	low	primary bladder cancer	Homo sapiens	total RNA	male
GSM340741	Tumoral bladder tissues	GPL6102	T1N0M0	low	primary bladder cancer	Homo sapiens	total RNA	male
GSM340742	Tumoral bladder tissues	GPL6102	T1N0M0	low	primary bladder cancer	Homo sapiens	total RNA	female
GSM340743	Tumoral bladder tissues	GPL6102	T1N0M0	low	primary bladder cancer	Homo sapiens	total RNA	male
GSM340744	Tumoral bladder tissues	GPL6102	T1N0M0	high	primary bladder cancer	Homo sapiens	total RNA	male
GSM340745	Tumoral bladder tissues	GPL6102	TaN3M1	high	primary bladder cancer	Homo sapiens	total RNA	female
GSM340746	Tumoral bladder tissues	GPL6102	T2N0M0	high	primary bladder cancer	Homo sapiens	total RNA	male
GSM340747	Tumoral bladder tissues	GPL6102	T4N0M1	low	primary bladder cancer	Homo sapiens	total RNA	male
GSM340748	Tumoral bladder tissues	GPL6102	T1N0M0	low	primary bladder cancer	Homo sapiens	total RNA	male
GSM340749	Tumoral bladder tissues	GPL6102	T1N0M0	low	primary bladder cancer	Homo sapiens	total RNA	male
GSM340750	Tumoral bladder tissues	GPL6102	TaN0M0	low	primary bladder cancer	Homo sapiens	total RNA	male
GSM340751	Tumoral bladder tissues	GPL6102	T1N0M0	low	primary bladder cancer	Homo sapiens	total RNA	male
GSM340752	Tumoral bladder tissues	GPL6102	T1N0M0	high	primary bladder cancer	Homo sapiens	total RNA	female
GSM340753	Tumoral bladder tissues	GPL6102	TaN0M0	low	primary bladder cancer	Homo sapiens	total RNA	female
GSM340754	Tumoral bladder tissues	GPL6102	T1N0M0	low	primary bladder cancer	Homo sapiens	total RNA	male
GSM340755	Tumoral bladder tissues	GPL6102	T1N0M0	high	primary bladder cancer	Homo sapiens	total RNA	male
GSM340756	Tumoral bladder tissues	GPL6102	TaN0M0	low	primary bladder cancer	Homo sapiens	total RNA	female
GSM340757	Tumoral bladder tissues	GPL6102	T2N0M0	high	primary bladder cancer	Homo sapiens	total RNA	male
GSM340758	Tumoral bladder tissues	GPL6102	T4N1M0	high	primary bladder cancer	Homo sapiens	total RNA	female
GSM340759	Tumoral bladder tissues	GPL6102	T2N1M1	high	primary bladder cancer	Homo sapiens	total RNA	male
GSM340760	Tumoral bladder tissues	GPL6102	T4N0M0	high	primary bladder cancer	Homo sapiens	total RNA	male
GSM340761	Tumoral bladder tissues	GPL6102	T3NxM0	high	primary bladder cancer	Homo sapiens	total RNA	male
GSM340762	Tumoral bladder tissues	GPL6102	T4aN0M0	high	primary bladder cancer	Homo sapiens	total RNA	male
GSM340763	Tumoral bladder tissues	GPL6102	T2N2M0	low	primary bladder cancer	Homo sapiens	total RNA	male
GSM340764	Tumoral bladder tissues	GPL6102	T3aN0M0	low	primary bladder cancer	Homo sapiens	total RNA	male
GSM340765	Tumoral bladder tissues	GPL6102	T4N2M0	high	primary bladder cancer	Homo sapiens	total RNA	male
GSM340766	Tumoral bladder tissues	GPL6102	T2N0M0	high	primary bladder cancer	Homo sapiens	total RNA	male
GSM340767	Tumoral bladder tissues	GPL6102	T2N0M0	low	primary bladder cancer	Homo sapiens	total RNA	female
GSM340768	Tumoral bladder tissues	GPL6102	T1N0M0	low	primary bladder cancer	Homo sapiens	total RNA	male
GSM340769	Tumoral bladder tissues	GPL6102	T2aN0M0	high	primary bladder cancer	Homo sapiens	total RNA	male
GSM340770	Tumoral bladder tissues	GPL6102	no information	no information	recurrent non-muscle invasive tumor	Homo sapiens	total RNA	no information
GSM340771	Tumoral bladder tissues	GPL6102	no information	no information	recurrent non-muscle invasive tumor	Homo sapiens	total RNA	no information
GSM340772	Tumoral bladder tissues	GPL6102	no information	no information	recurrent non-muscle invasive tumor	Homo sapiens	total RNA	no information
GSM340773	Tumoral bladder tissues	GPL6102	no information	no information	recurrent non-muscle invasive tumor	Homo sapiens	total RNA	no information
GSM340774	Tumoral bladder tissues	GPL6102	no information	no information	recurrent non-muscle invasive tumor	Homo sapiens	total RNA	no information
GSM340775	Tumoral bladder tissues	GPL6102	no information	no information	recurrent non-muscle invasive tumor	Homo sapiens	total RNA	no information
GSM340776	Tumoral bladder tissues	GPL6102	no information	no information	recurrent non-muscle invasive tumor	Homo sapiens	total RNA	no information
GSM340777	Tumoral bladder tissues	GPL6102	no information	no information	recurrent non-muscle invasive tumor	Homo sapiens	total RNA	no information
GSM340778	Tumoral bladder tissues	GPL6102	no information	no information	recurrent non-muscle invasive tumor	Homo sapiens	total RNA	no information
GSM340779	Tumoral bladder tissues	GPL6102	no information	no information	recurrent non-muscle invasive tumor	Homo sapiens	total RNA	no information
GSM340780	Tumoral bladder tissues	GPL6102	no information	no information	recurrent non-muscle invasive tumor	Homo sapiens	total RNA	no information
GSM340781	Tumoral bladder tissues	GPL6102	no information	no information	recurrent non-muscle invasive tumor	Homo sapiens	total RNA	no information
GSM340782	Tumoral bladder tissues	GPL6102	no information	no information	recurrent non-muscle invasive tumor	Homo sapiens	total RNA	no information
GSM340783	Tumoral bladder tissues	GPL6102	no information	no information	recurrent non-muscle invasive tumor	Homo sapiens	total RNA	no information
GSM340784	Tumoral bladder tissues	GPL6102	no information	no information	recurrent non-muscle invasive tumor	Homo sapiens	total RNA	no information
GSM340785	Tumoral bladder tissues	GPL6102	no information	no information	recurrent non-muscle invasive tumor	Homo sapiens	total RNA	no information
GSM340786	Tumoral bladder tissues	GPL6102	no information	no information	recurrent non-muscle invasive tumor	Homo sapiens	total RNA	no information
GSM340787	Tumoral bladder tissues	GPL6102	no information	no information	recurrent non-muscle invasive tumor	Homo sapiens	total RNA	no information
GSM340788	Tumoral bladder tissues	GPL6102	no information	no information	recurrent non-muscle invasive tumor	Homo sapiens	total RNA	no information
GSM340789	Tumoral bladder tissues	GPL6102	no information	no information	recurrent non-muscle invasive tumor	Homo sapiens	total RNA	no information
GSM340790	Tumoral bladder tissues	GPL6102	no information	no information	recurrent non-muscle invasive tumor	Homo sapiens	total RNA	no information
GSM340791	Tumoral bladder tissues	GPL6102	no information	no information	recurrent non-muscle invasive tumor	Homo sapiens	total RNA	no information
GSM340792	Tumoral bladder tissues	GPL6102	no information	no information	recurrent non-muscle invasive tumor	Homo sapiens	total RNA	no information

## Sheet: GSE37815
Sample ID	Type	Platform	Stage	Grade	Biological source	Organism	Molecule	Gender
GSM340538	Normal bladder tissues	GPL6102	none	none	Normal bladder tissues	Homo sapiens	total RNA	no information
GSM340539	Normal bladder tissues	GPL6102	none	none	Normal bladder tissues	Homo sapiens	total RNA	no information
GSM340541	Normal bladder tissues	GPL6102	none	none	Normal bladder tissues	Homo sapiens	total RNA	no information
GSM340542	Normal bladder tissues	GPL6102	none	none	Normal bladder tissues	Homo sapiens	total RNA	no information
GSM340544	Normal bladder tissues	GPL6102	none	none	Normal bladder tissues	Homo sapiens	total RNA	no information
GSM340545	Normal bladder tissues	GPL6102	none	none	Normal bladder tissues	Homo sapiens	total RNA	no information
GSM340642	Tumoral bladder tissues	GPL6102	T1N0M0	low	Primary bladder cancer	Homo sapiens	total RNA	male
GSM340645	Tumoral bladder tissues	GPL6102	T1N0M0	high	Primary bladder cancer	Homo sapiens	total RNA	male
GSM340651	Tumoral bladder tissues	GPL6102	T1N0M0	low	Primary bladder cancer	Homo sapiens	total RNA	male
GSM340652	Tumoral bladder tissues	GPL6102	T1N0M0	low	Primary bladder cancer	Homo sapiens	total RNA	male
GSM340662	Tumoral bladder tissues	GPL6102	T1N0M0	high	Primary bladder cancer	Homo sapiens	total RNA	male
GSM340663	Tumoral bladder tissues	GPL6102	T1N0M0	high	Primary bladder cancer	Homo sapiens	total RNA	male
GSM340666	Tumoral bladder tissues	GPL6102	T1N0M0	low	Primary bladder cancer	Homo sapiens	total RNA	male
GSM340667	Tumoral bladder tissues	GPL6102	T1N0M0	low	Primary bladder cancer	Homo sapiens	total RNA	female
GSM340682	Tumoral bladder tissues	GPL6102	T1N0M0	low	Primary bladder cancer	Homo sapiens	total RNA	male
GSM340686	Tumoral bladder tissues	GPL6102	T1N0M0	low	Primary bladder cancer	Homo sapiens	total RNA	male
GSM340698	Tumoral bladder tissues	GPL6102	T1N0M0	high	Primary bladder cancer	Homo sapiens	total RNA	male
GSM340710	Tumoral bladder tissues	GPL6102	T1N0M0	high	Primary bladder cancer	Homo sapiens	total RNA	male
GSM340711	Tumoral bladder tissues	GPL6102	T1N0M0	low	Primary bladder cancer	Homo sapiens	total RNA	female
GSM340713	Tumoral bladder tissues	GPL6102	T1N0M0	low	Primary bladder cancer	Homo sapiens	total RNA	male
GSM340717	Tumoral bladder tissues	GPL6102	T1N0M0	low	Primary bladder cancer	Homo sapiens	total RNA	male
GSM340737	Tumoral bladder tissues	GPL6102	T1N0M0	low	Primary bladder cancer	Homo sapiens	total RNA	male
GSM340740	Tumoral bladder tissues	GPL6102	T1N0M0	low	Primary bladder cancer	Homo sapiens	total RNA	male
GSM340749	Tumoral bladder tissues	GPL6102	T1N0M0	low	Primary bladder cancer	Homo sapiens	total RNA	male

## Sheet: GSE65635
Sample ID	Type	Platform	Stage	Grade	Biological source	Organism	molecule	Gender
GSM1602279	Normal bladder tissues	GPL14951	none	none	Normal bladder tissues	Homo sapiens	total RNA	no information
GSM1602280	Normal bladder tissues	GPL14951	none	none	Normal bladder tissues	Homo sapiens	total RNA	no information
GSM1602281	Normal bladder tissues	GPL14951	none	none	Normal bladder tissues	Homo sapiens	total RNA	no information
GSM1602282	Normal bladder tissues	GPL14951	none	none	Normal bladder tissues	Homo sapiens	total RNA	no information
GSM1602283	Tumoral bladder tissues	GPL14951	T1N0M0	high	Primary bladder cancer	Homo sapiens	total RNA	male
GSM1602284	Tumoral bladder tissues	GPL14951	T3bN0M0	high	Primary bladder cancer	Homo sapiens	total RNA	female
GSM1602285	Tumoral bladder tissues	GPL14951	T1NxM0	low	Primary bladder cancer	Homo sapiens	total RNA	male
GSM1602286	Tumoral bladder tissues	GPL14951	T1NxM0	low	Recurrent bladder cancer	Homo sapiens	total RNA	male
GSM1602287	Tumoral bladder tissues	GPL14951	T3bN1M0	high	Recurrent bladder cancer	Homo sapiens	total RNA	male
GSM1602288	Tumoral bladder tissues	GPL14951	T4N0M0	low	Primary bladder cancer	Homo sapiens	total RNA	male
GSM1602289	Tumoral bladder tissues	GPL14951	T1N0M0	low	Primary bladder cancer	Homo sapiens	total RNA	male
GSM1602290	Tumoral bladder tissues	GPL14951	T1N0M0	low	Primary bladder cancer	Homo sapiens	total RNA	male
